# Supplementary material for: UDP-Induced Phagocytosis and ATP-Stimulated Chemotactic Migration Are Impaired inSTIM1−/−Microglia In Vitro and In Vivo
Source: Hindawi journal article supplement (doi:10.1155/2017/8158514), 2017-01-01
Supplement: f1 [file 8158514.f1.pdf]

**Supplement Figure 1.** mRNA and protein Expression of SOCE elements in primary cultured microglia from wild-type and *STIM1*<sup>-/-</sup> mice.

**A**

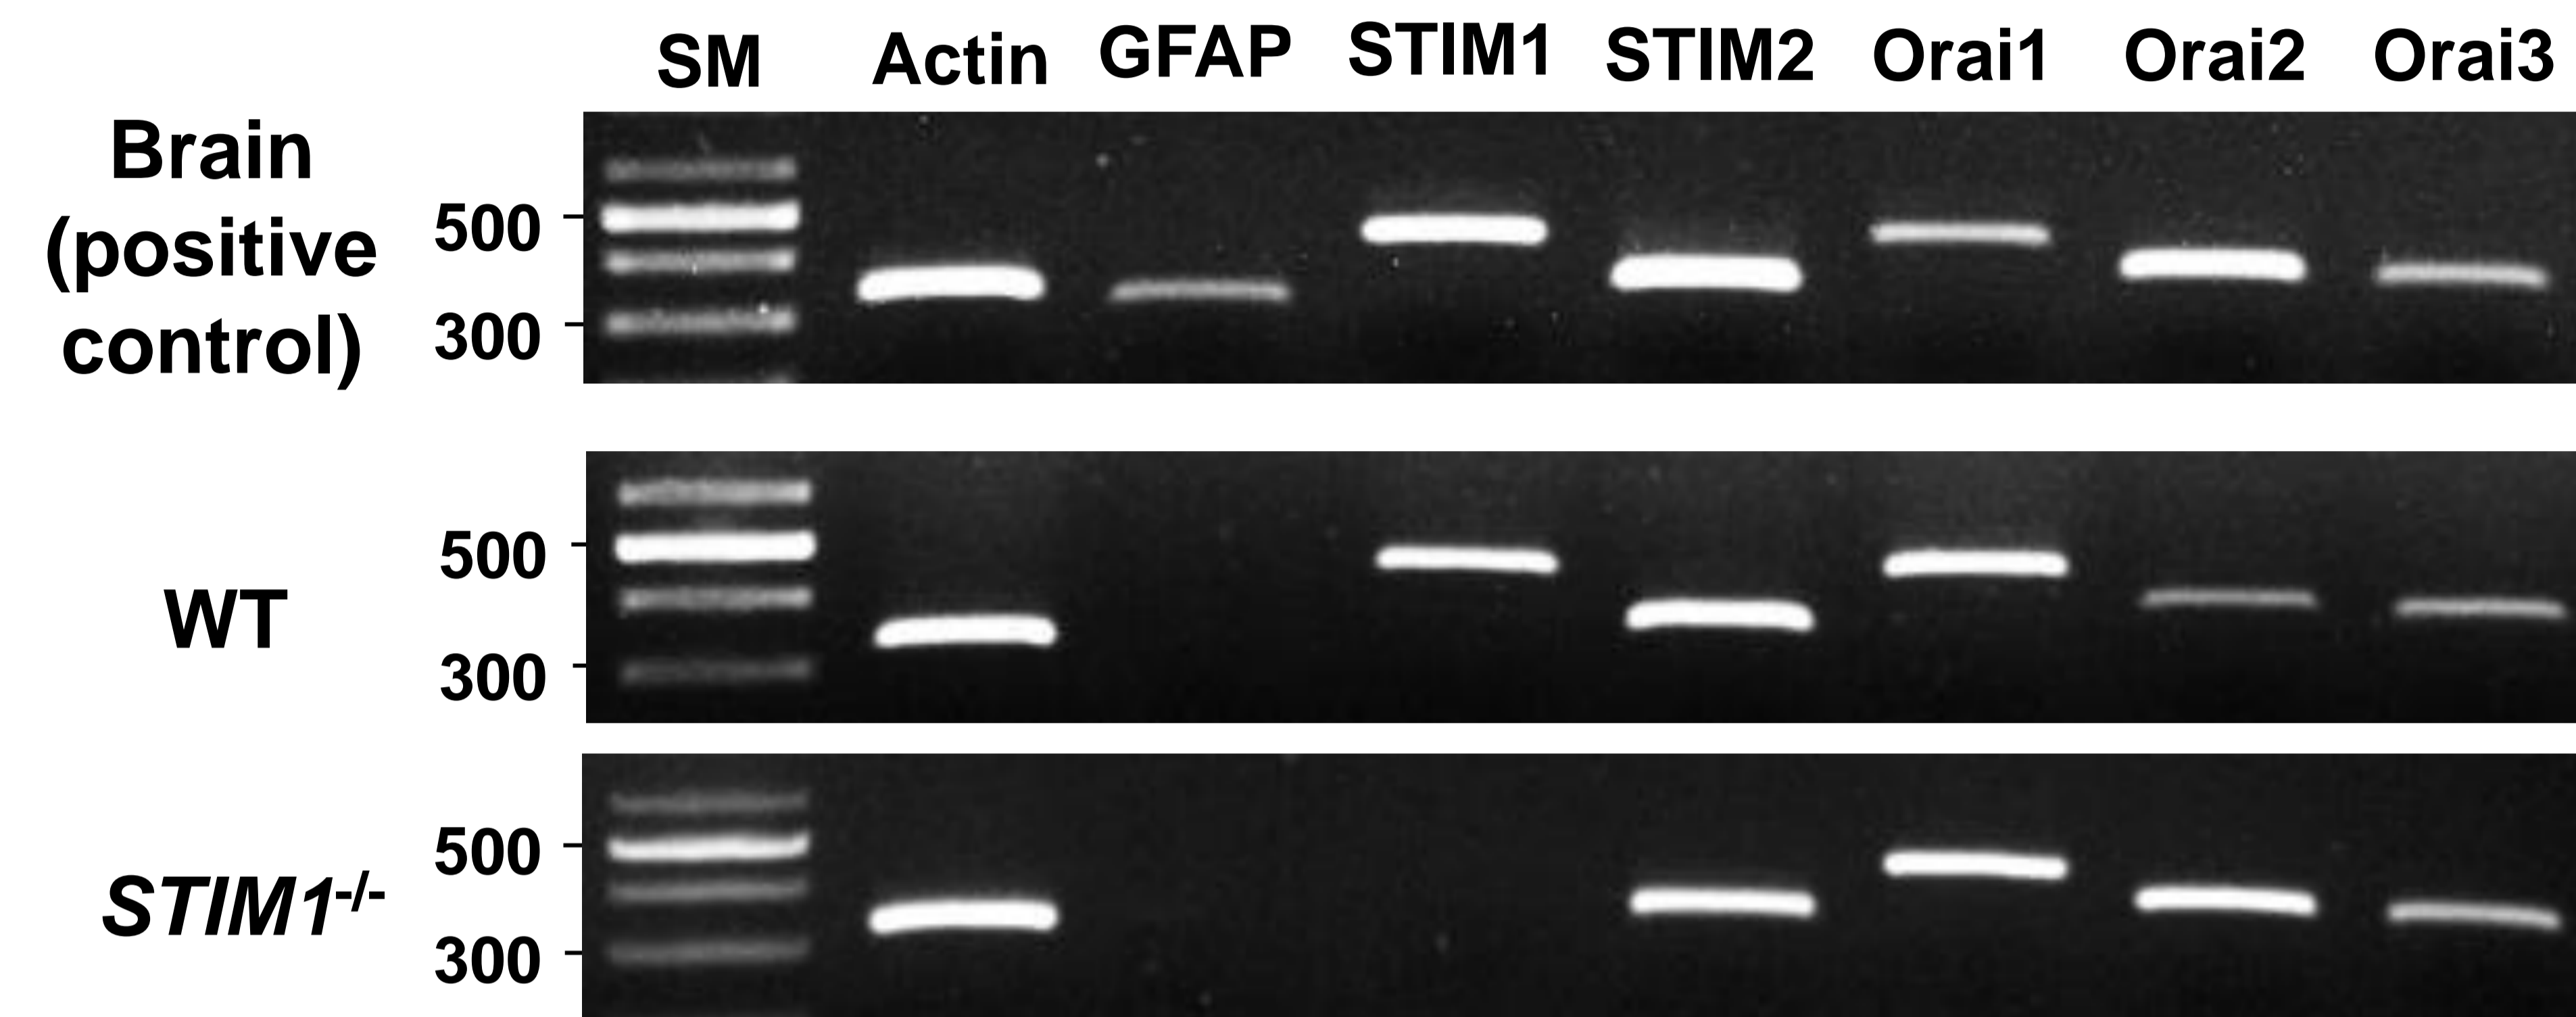

**B**

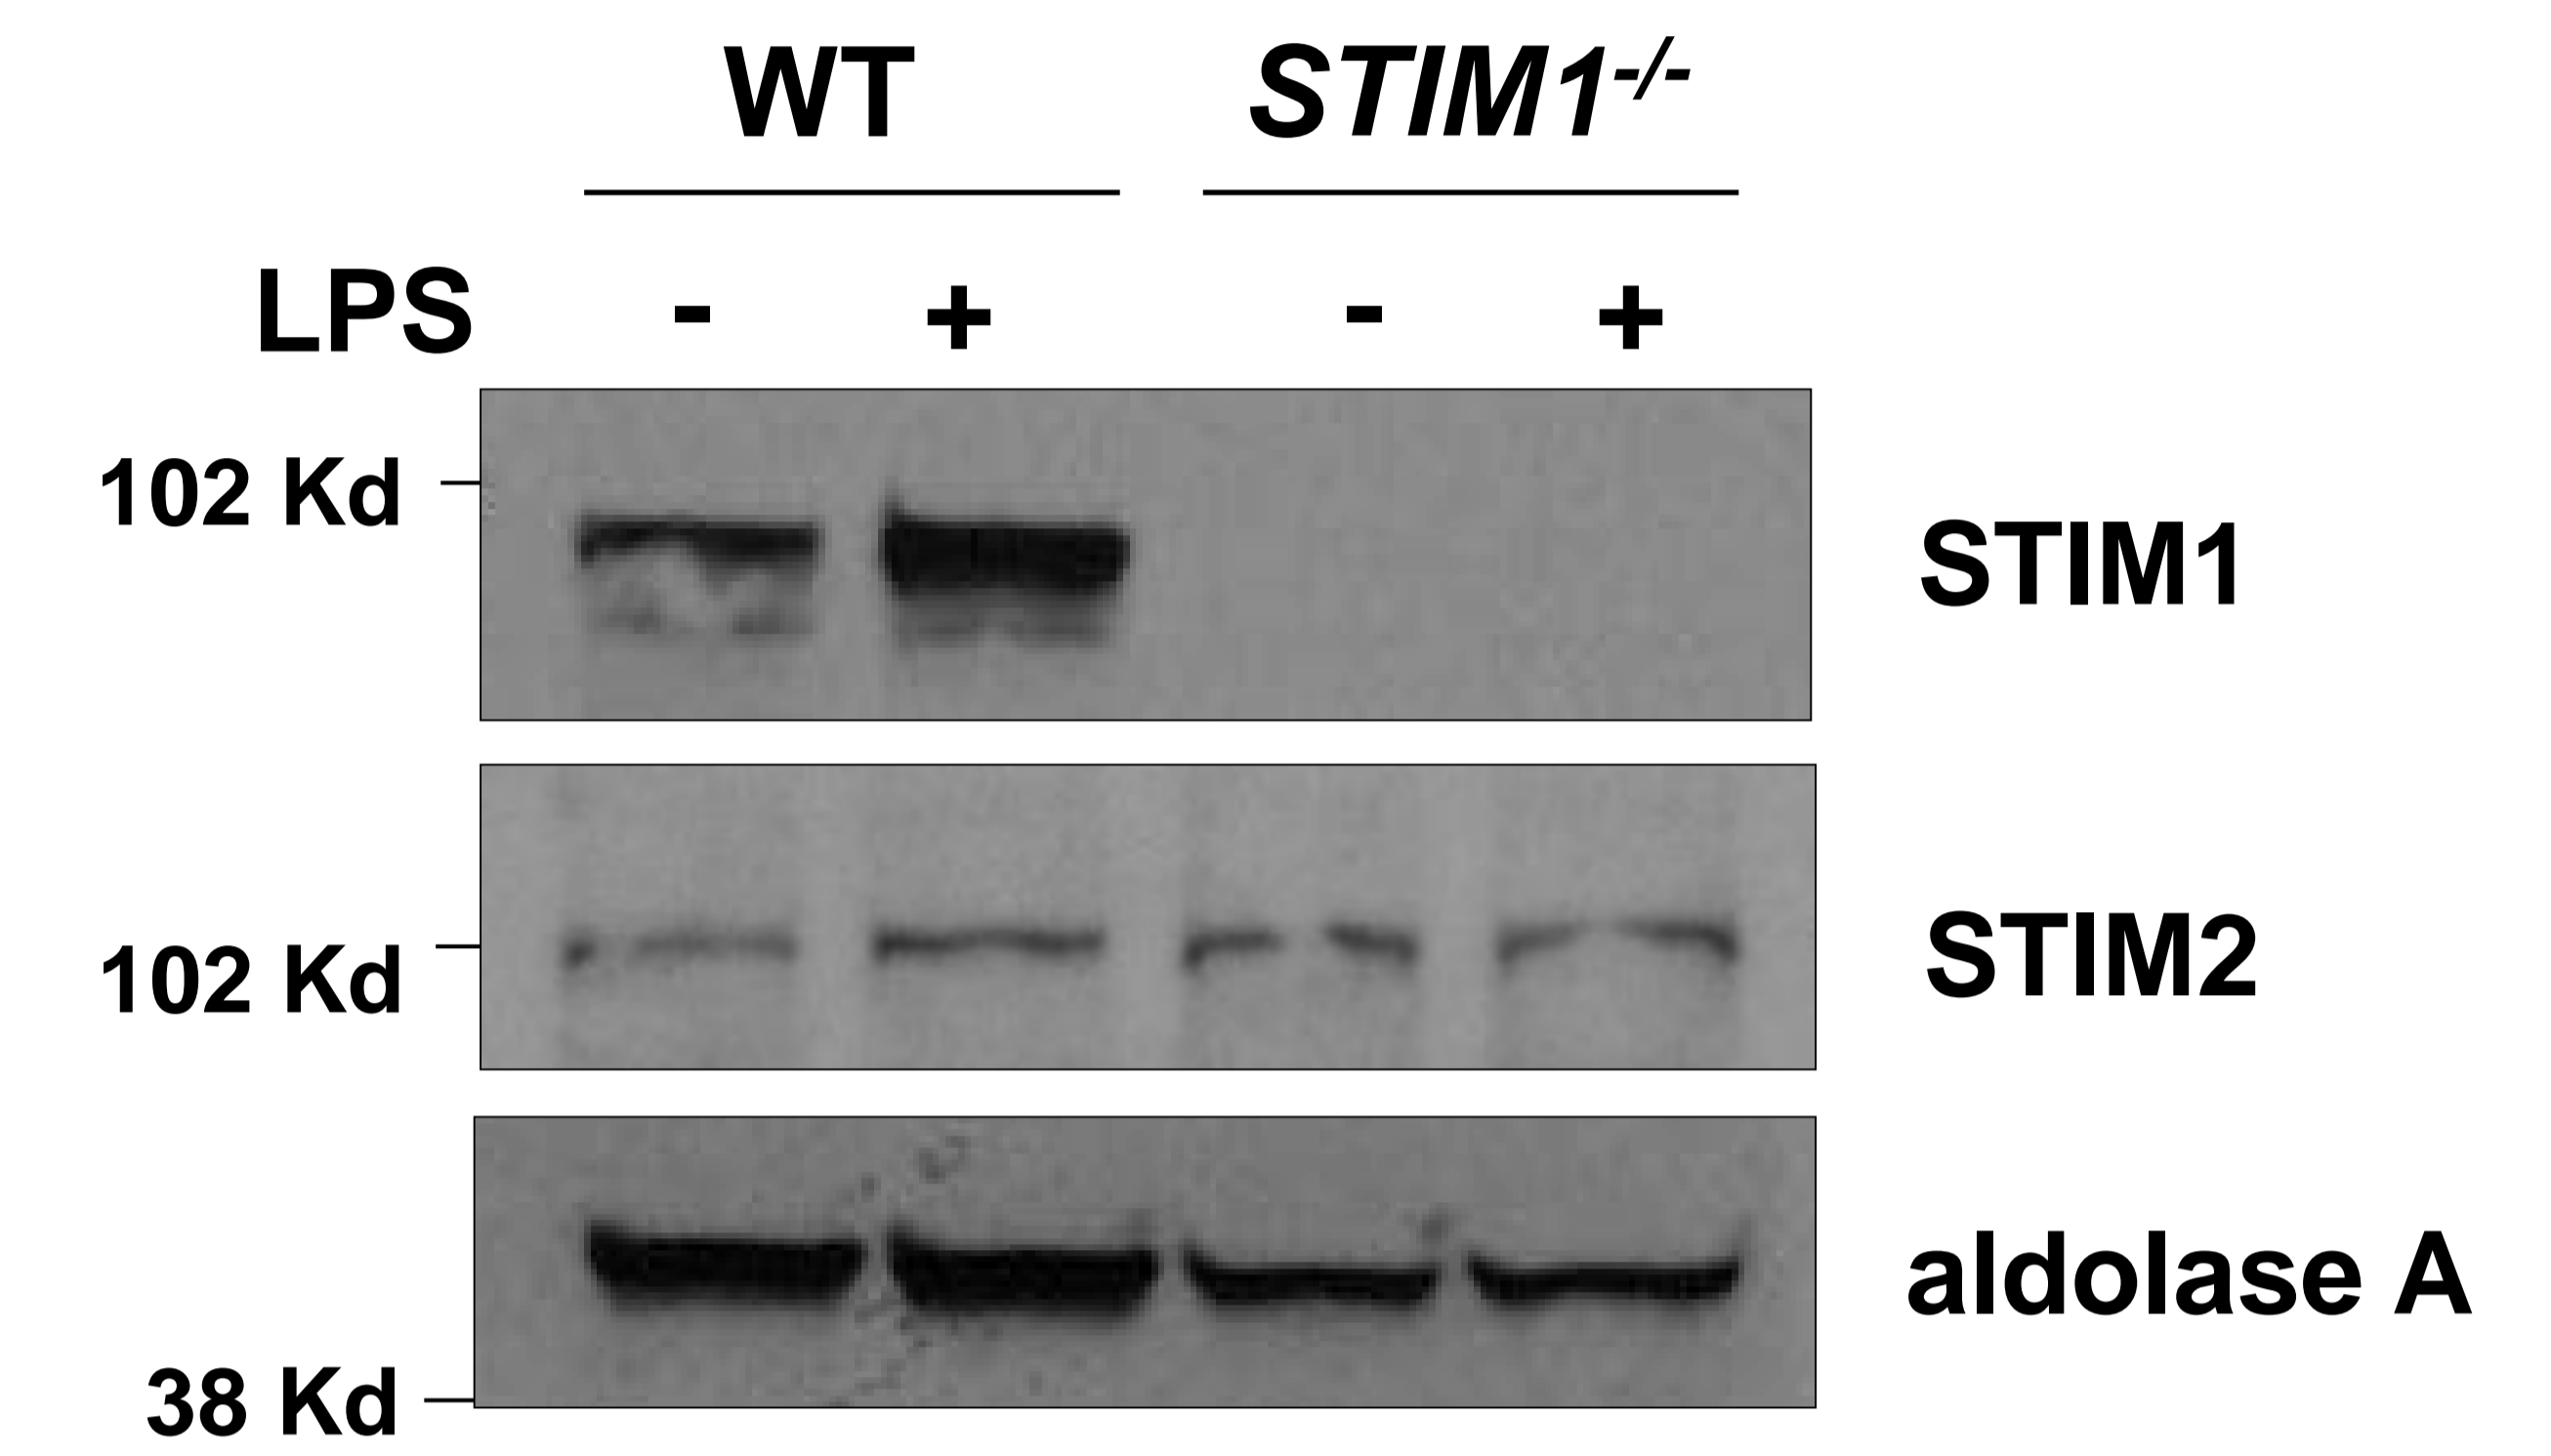

**Supplement Figure 2.** Cyclopiazonic acid (CPA) induced  $[Ca^{2+}]_i$  changes in WT and *STIM1*<sup>-/-</sup> microglia.

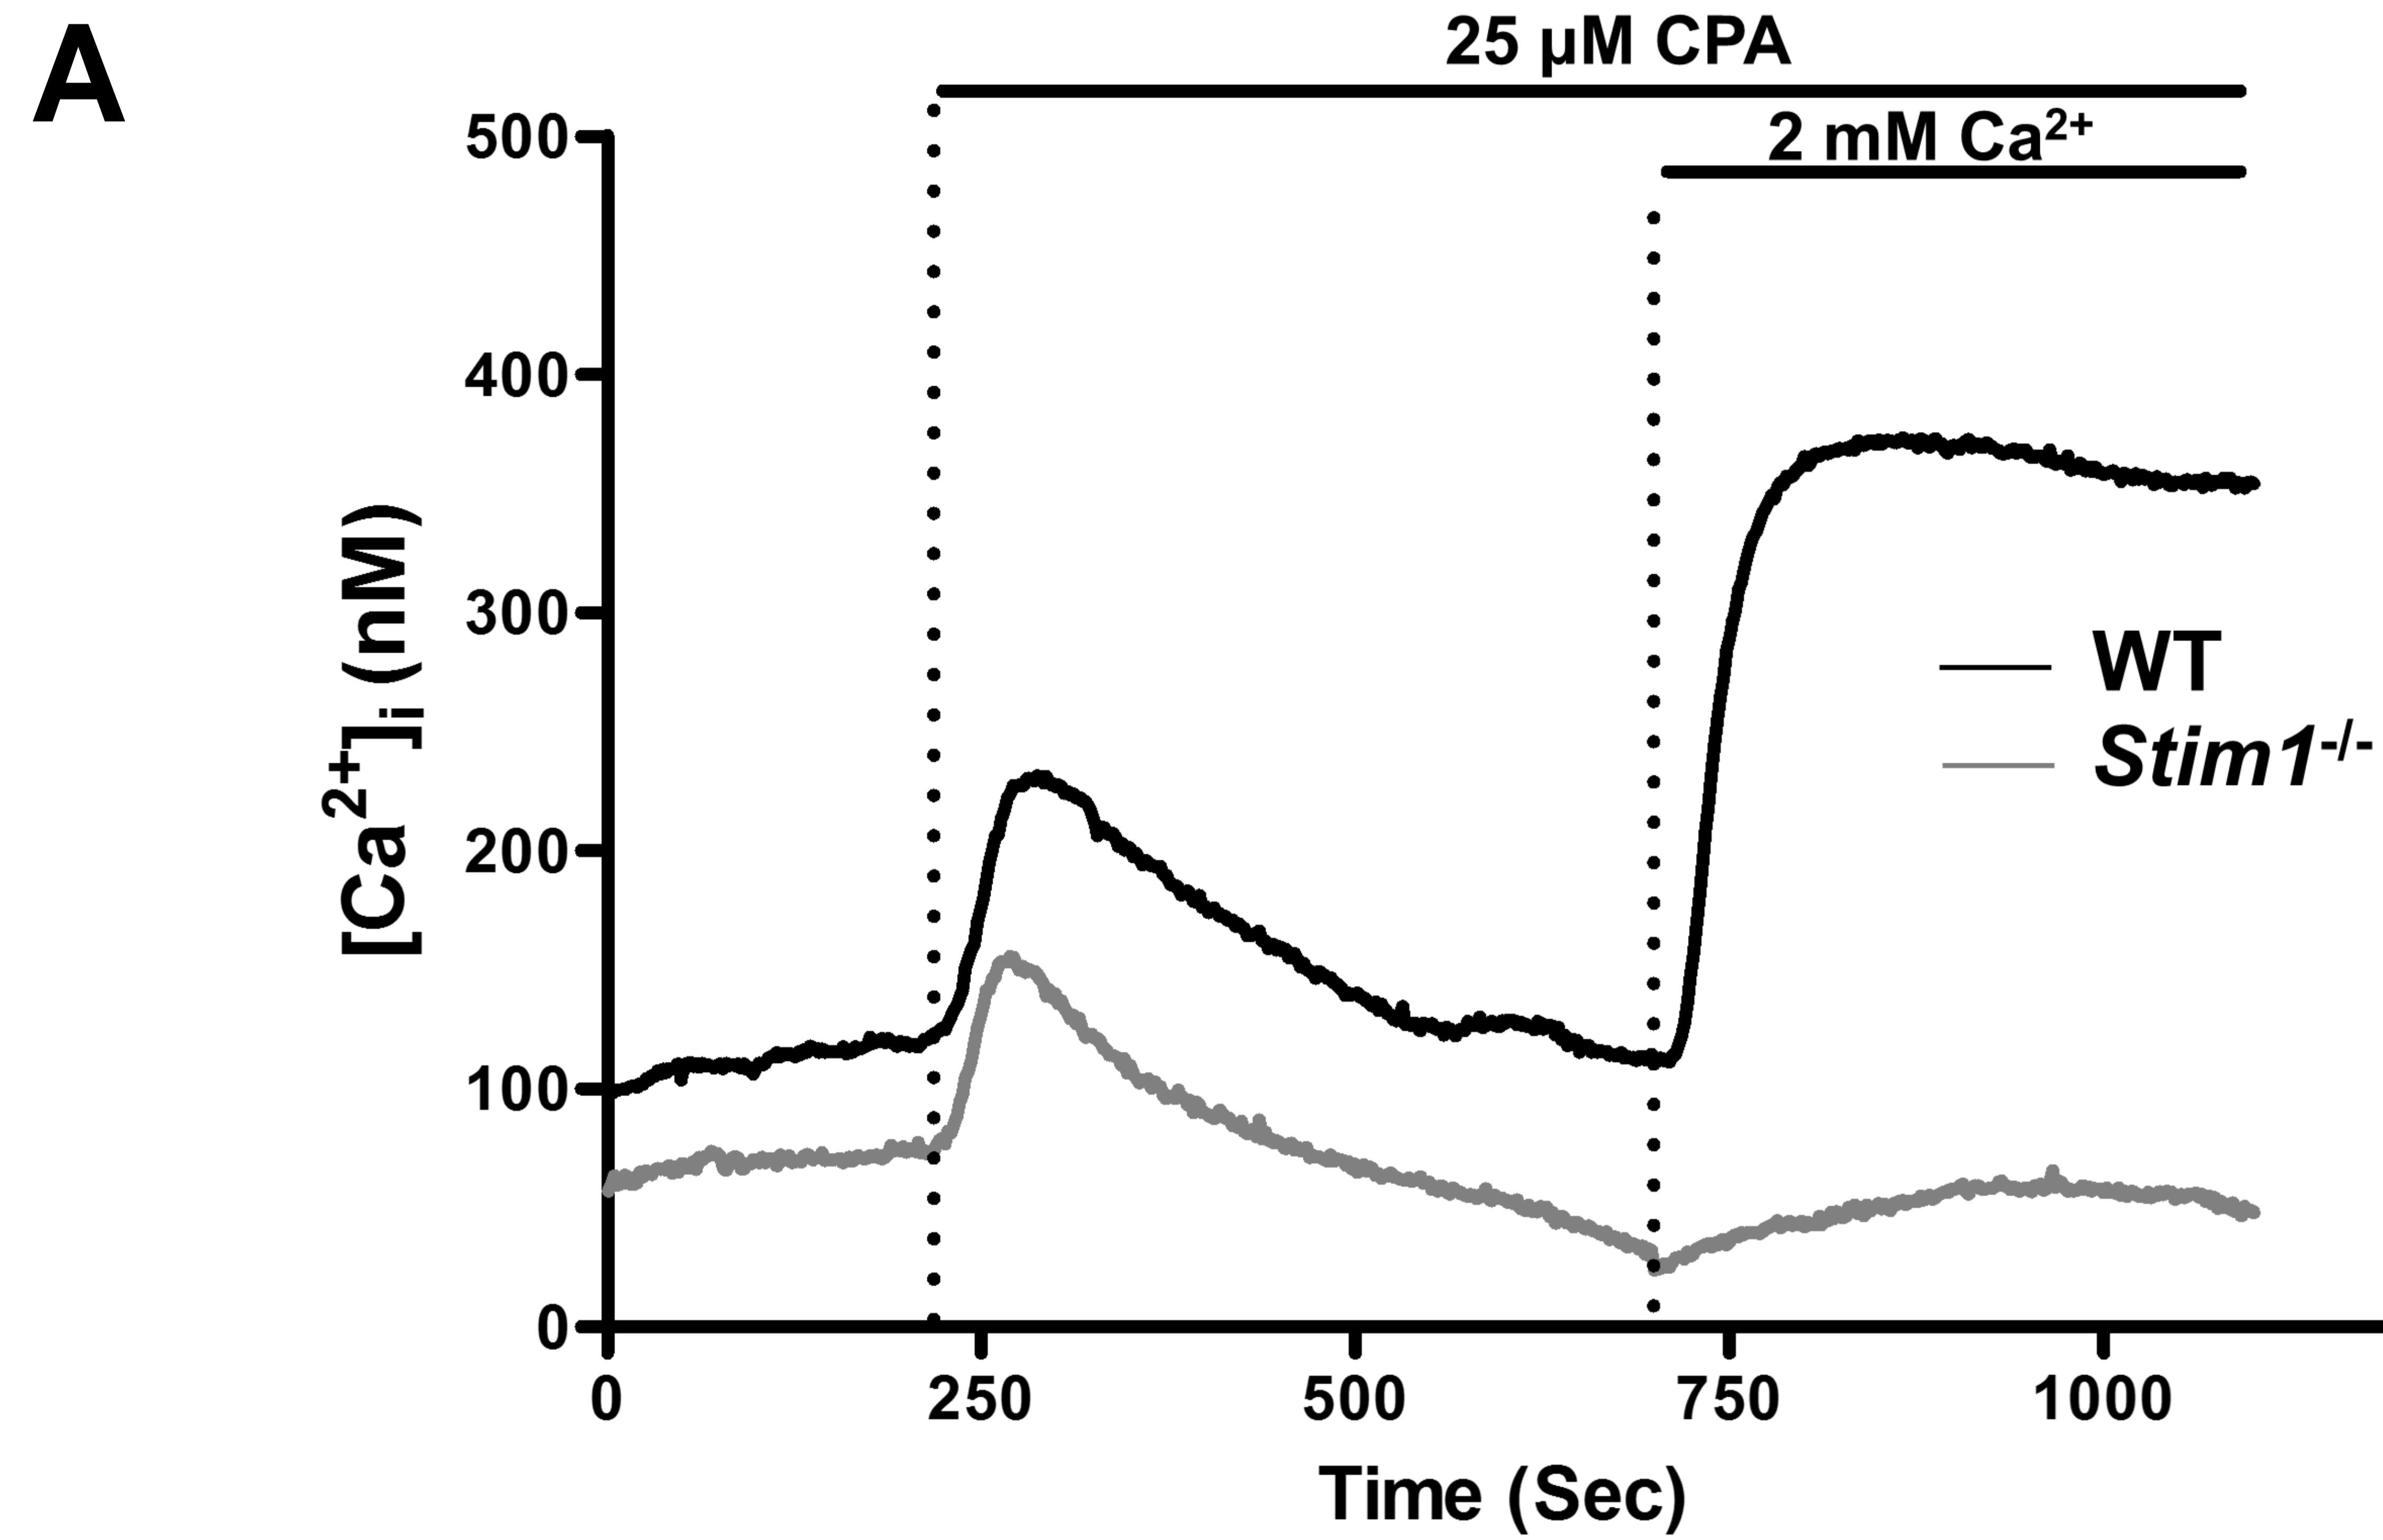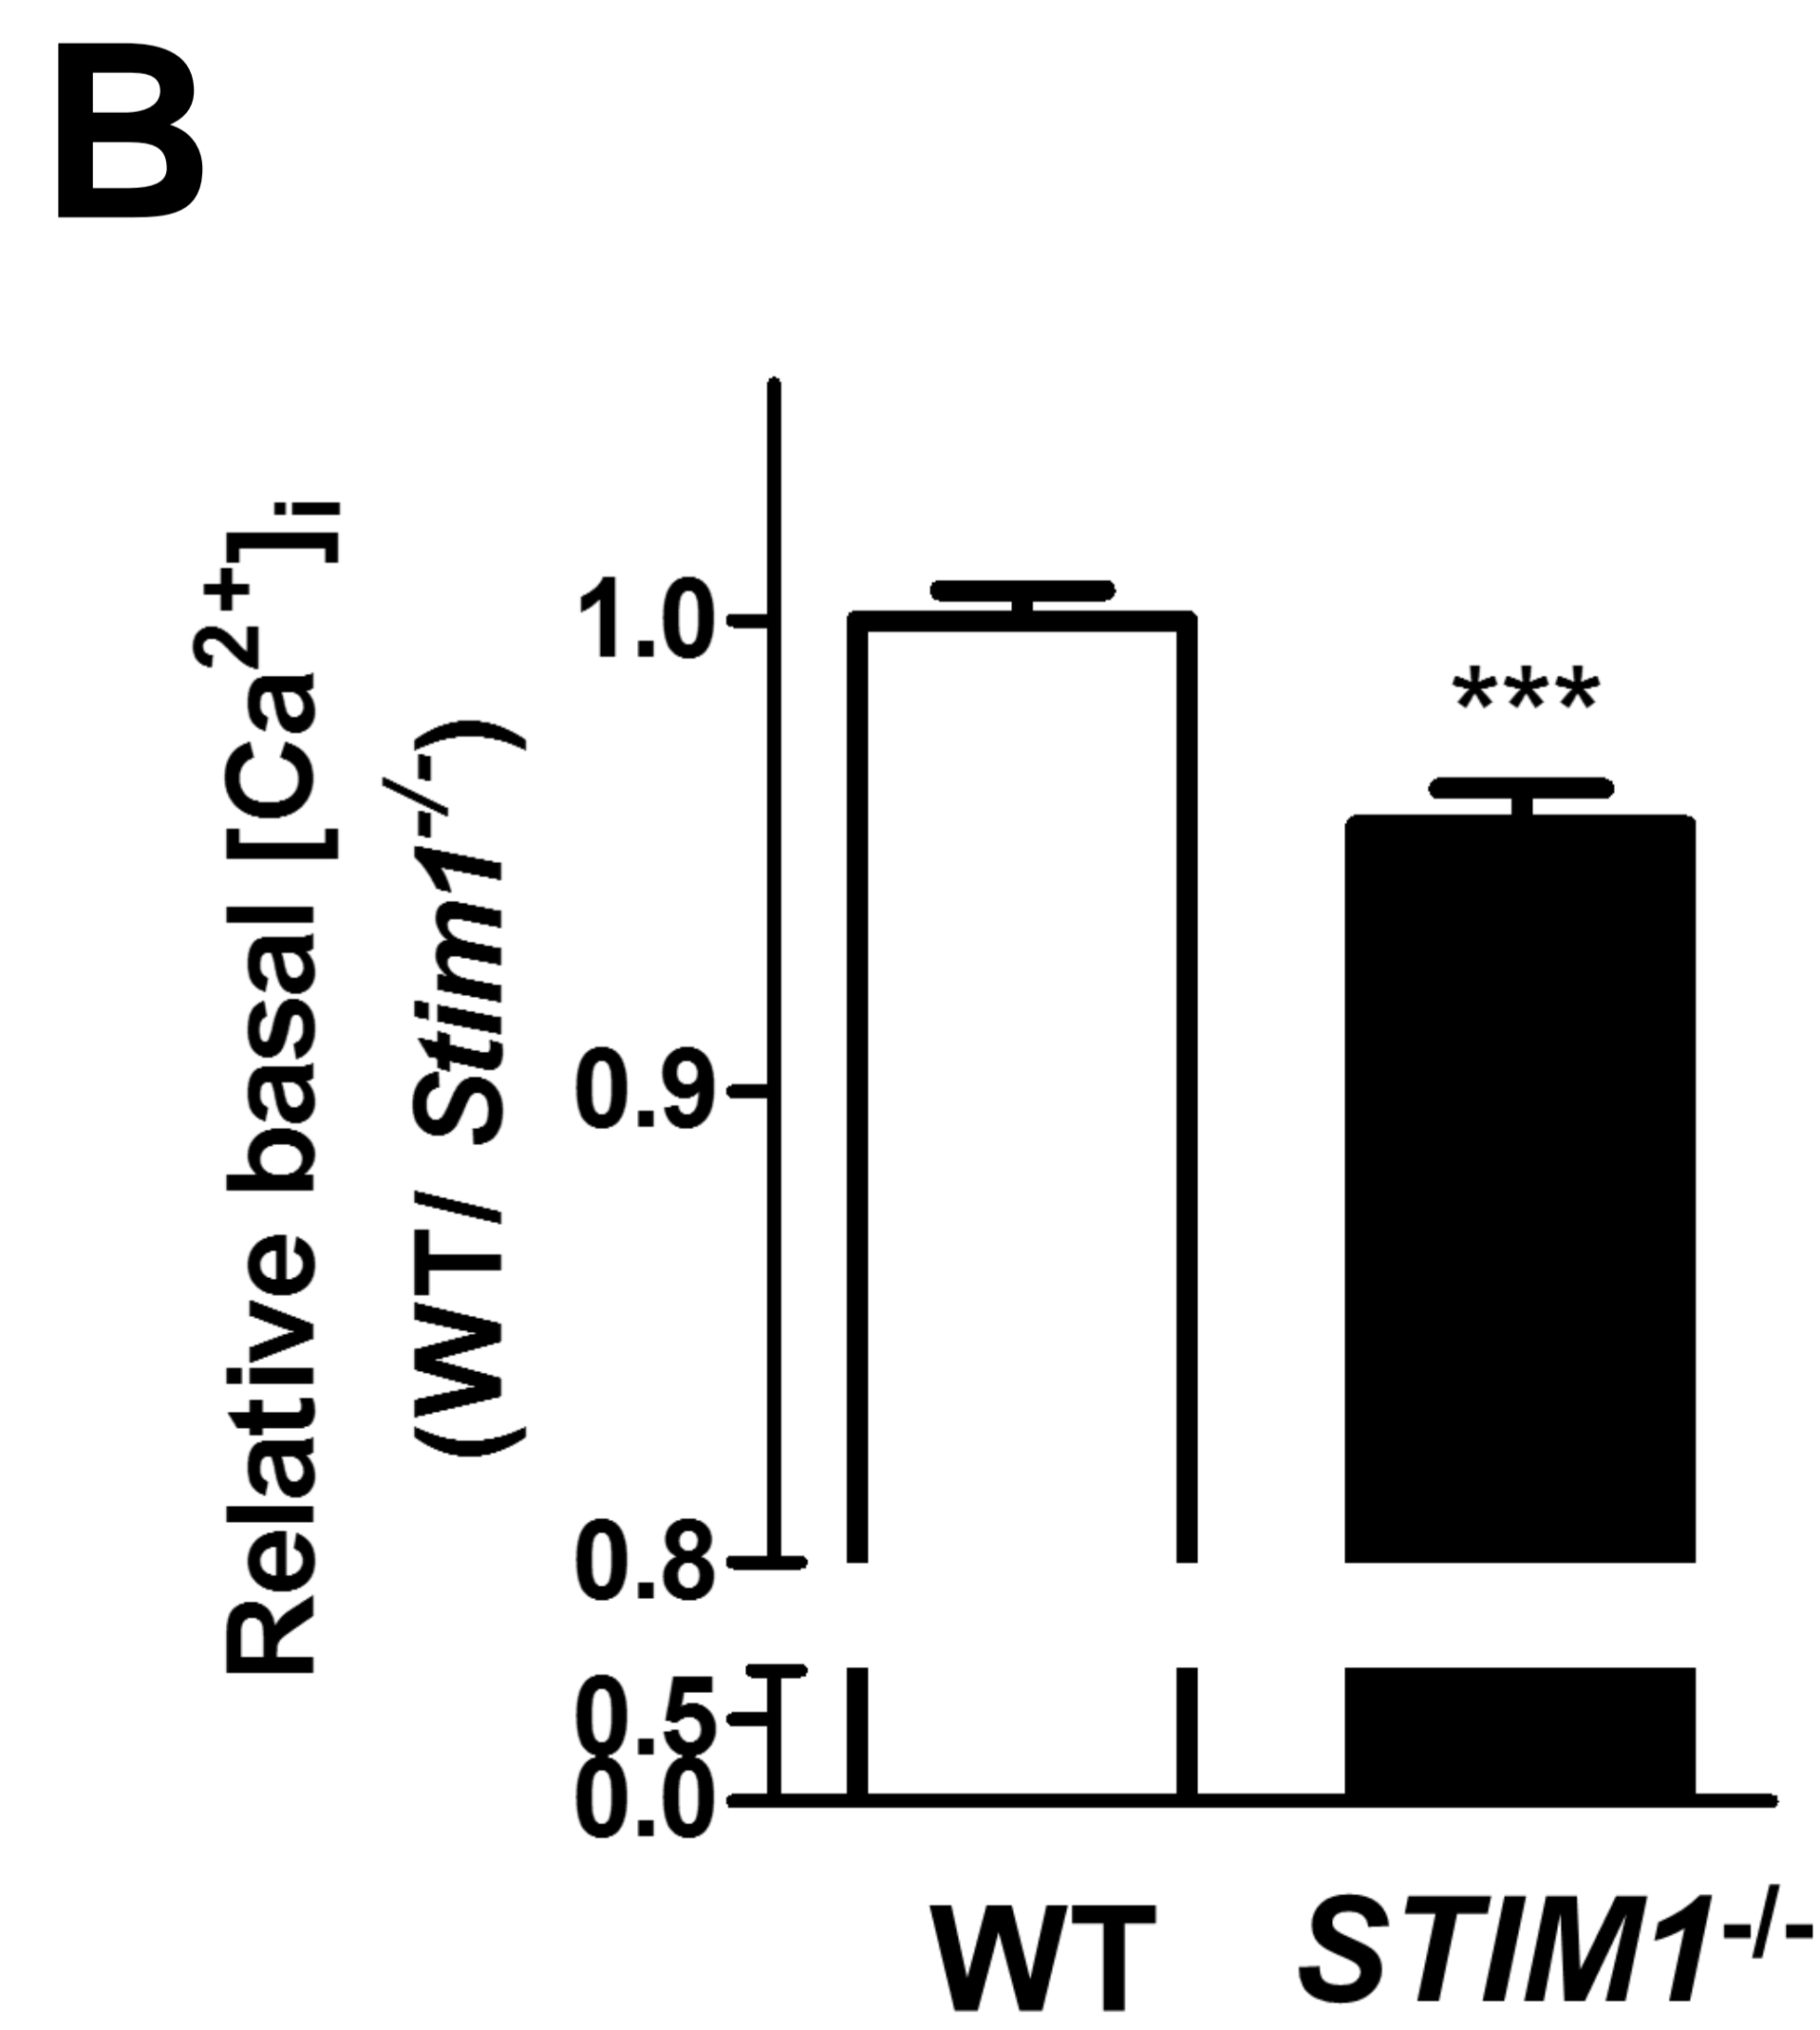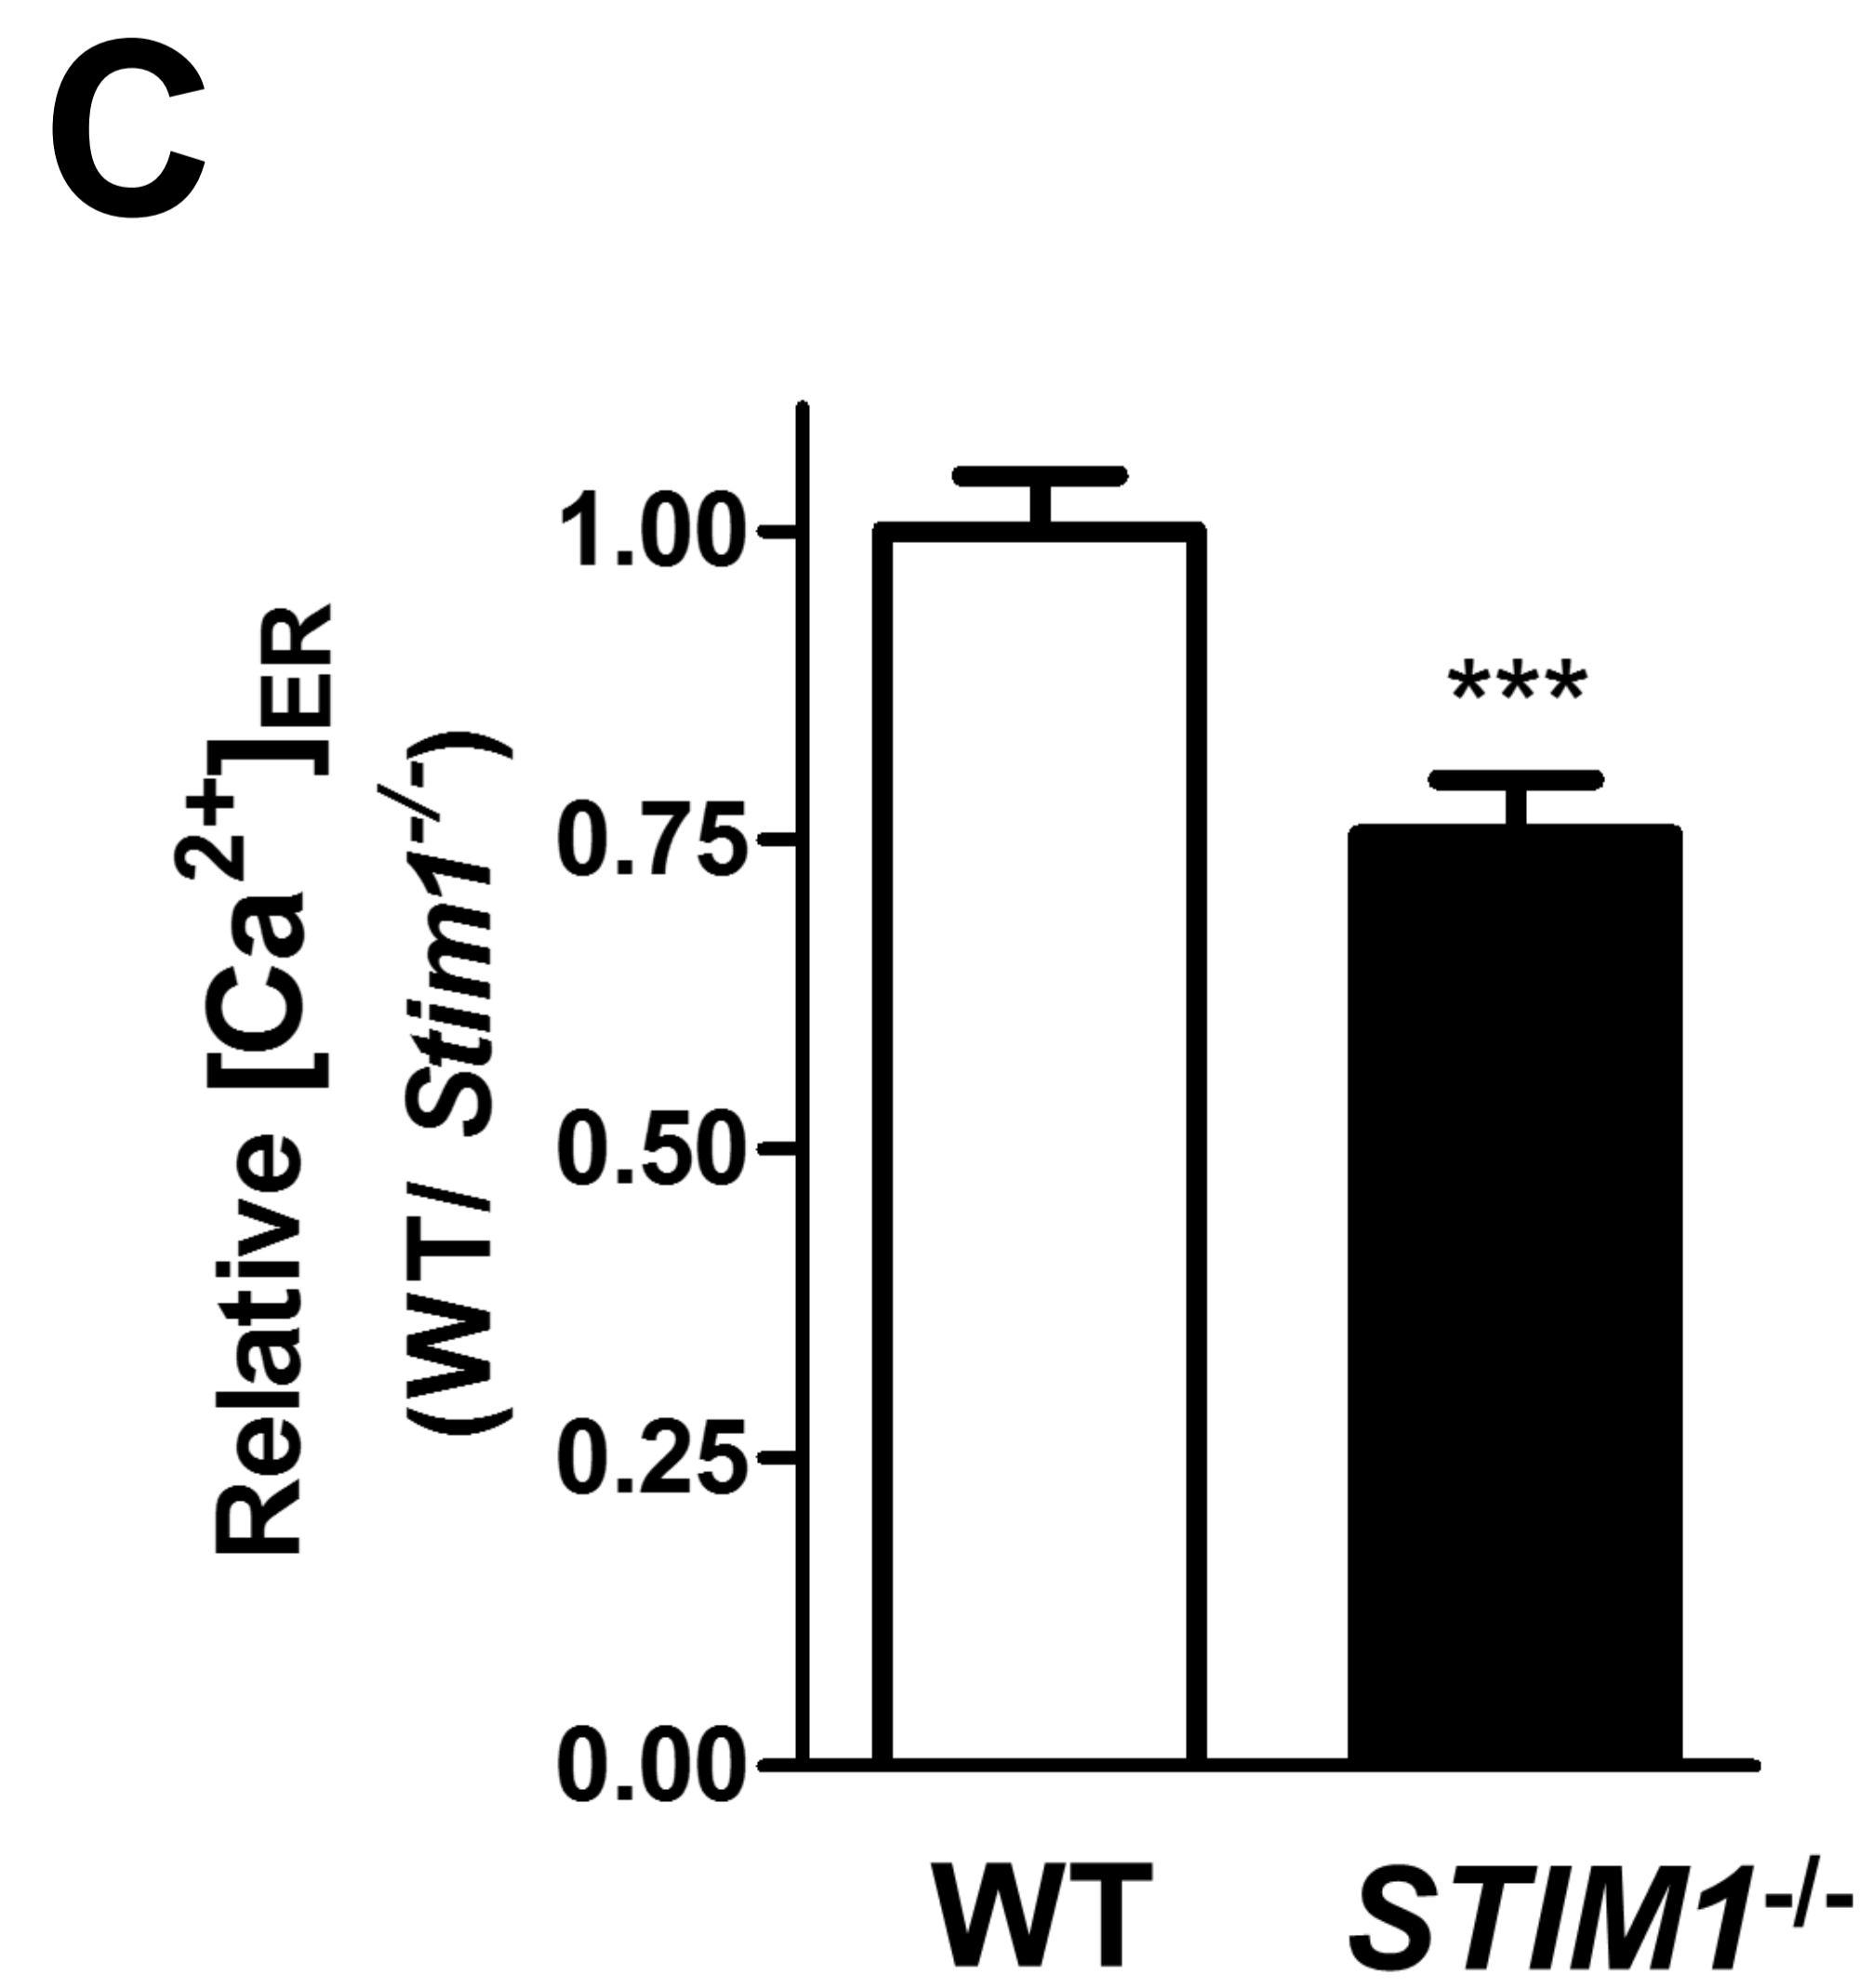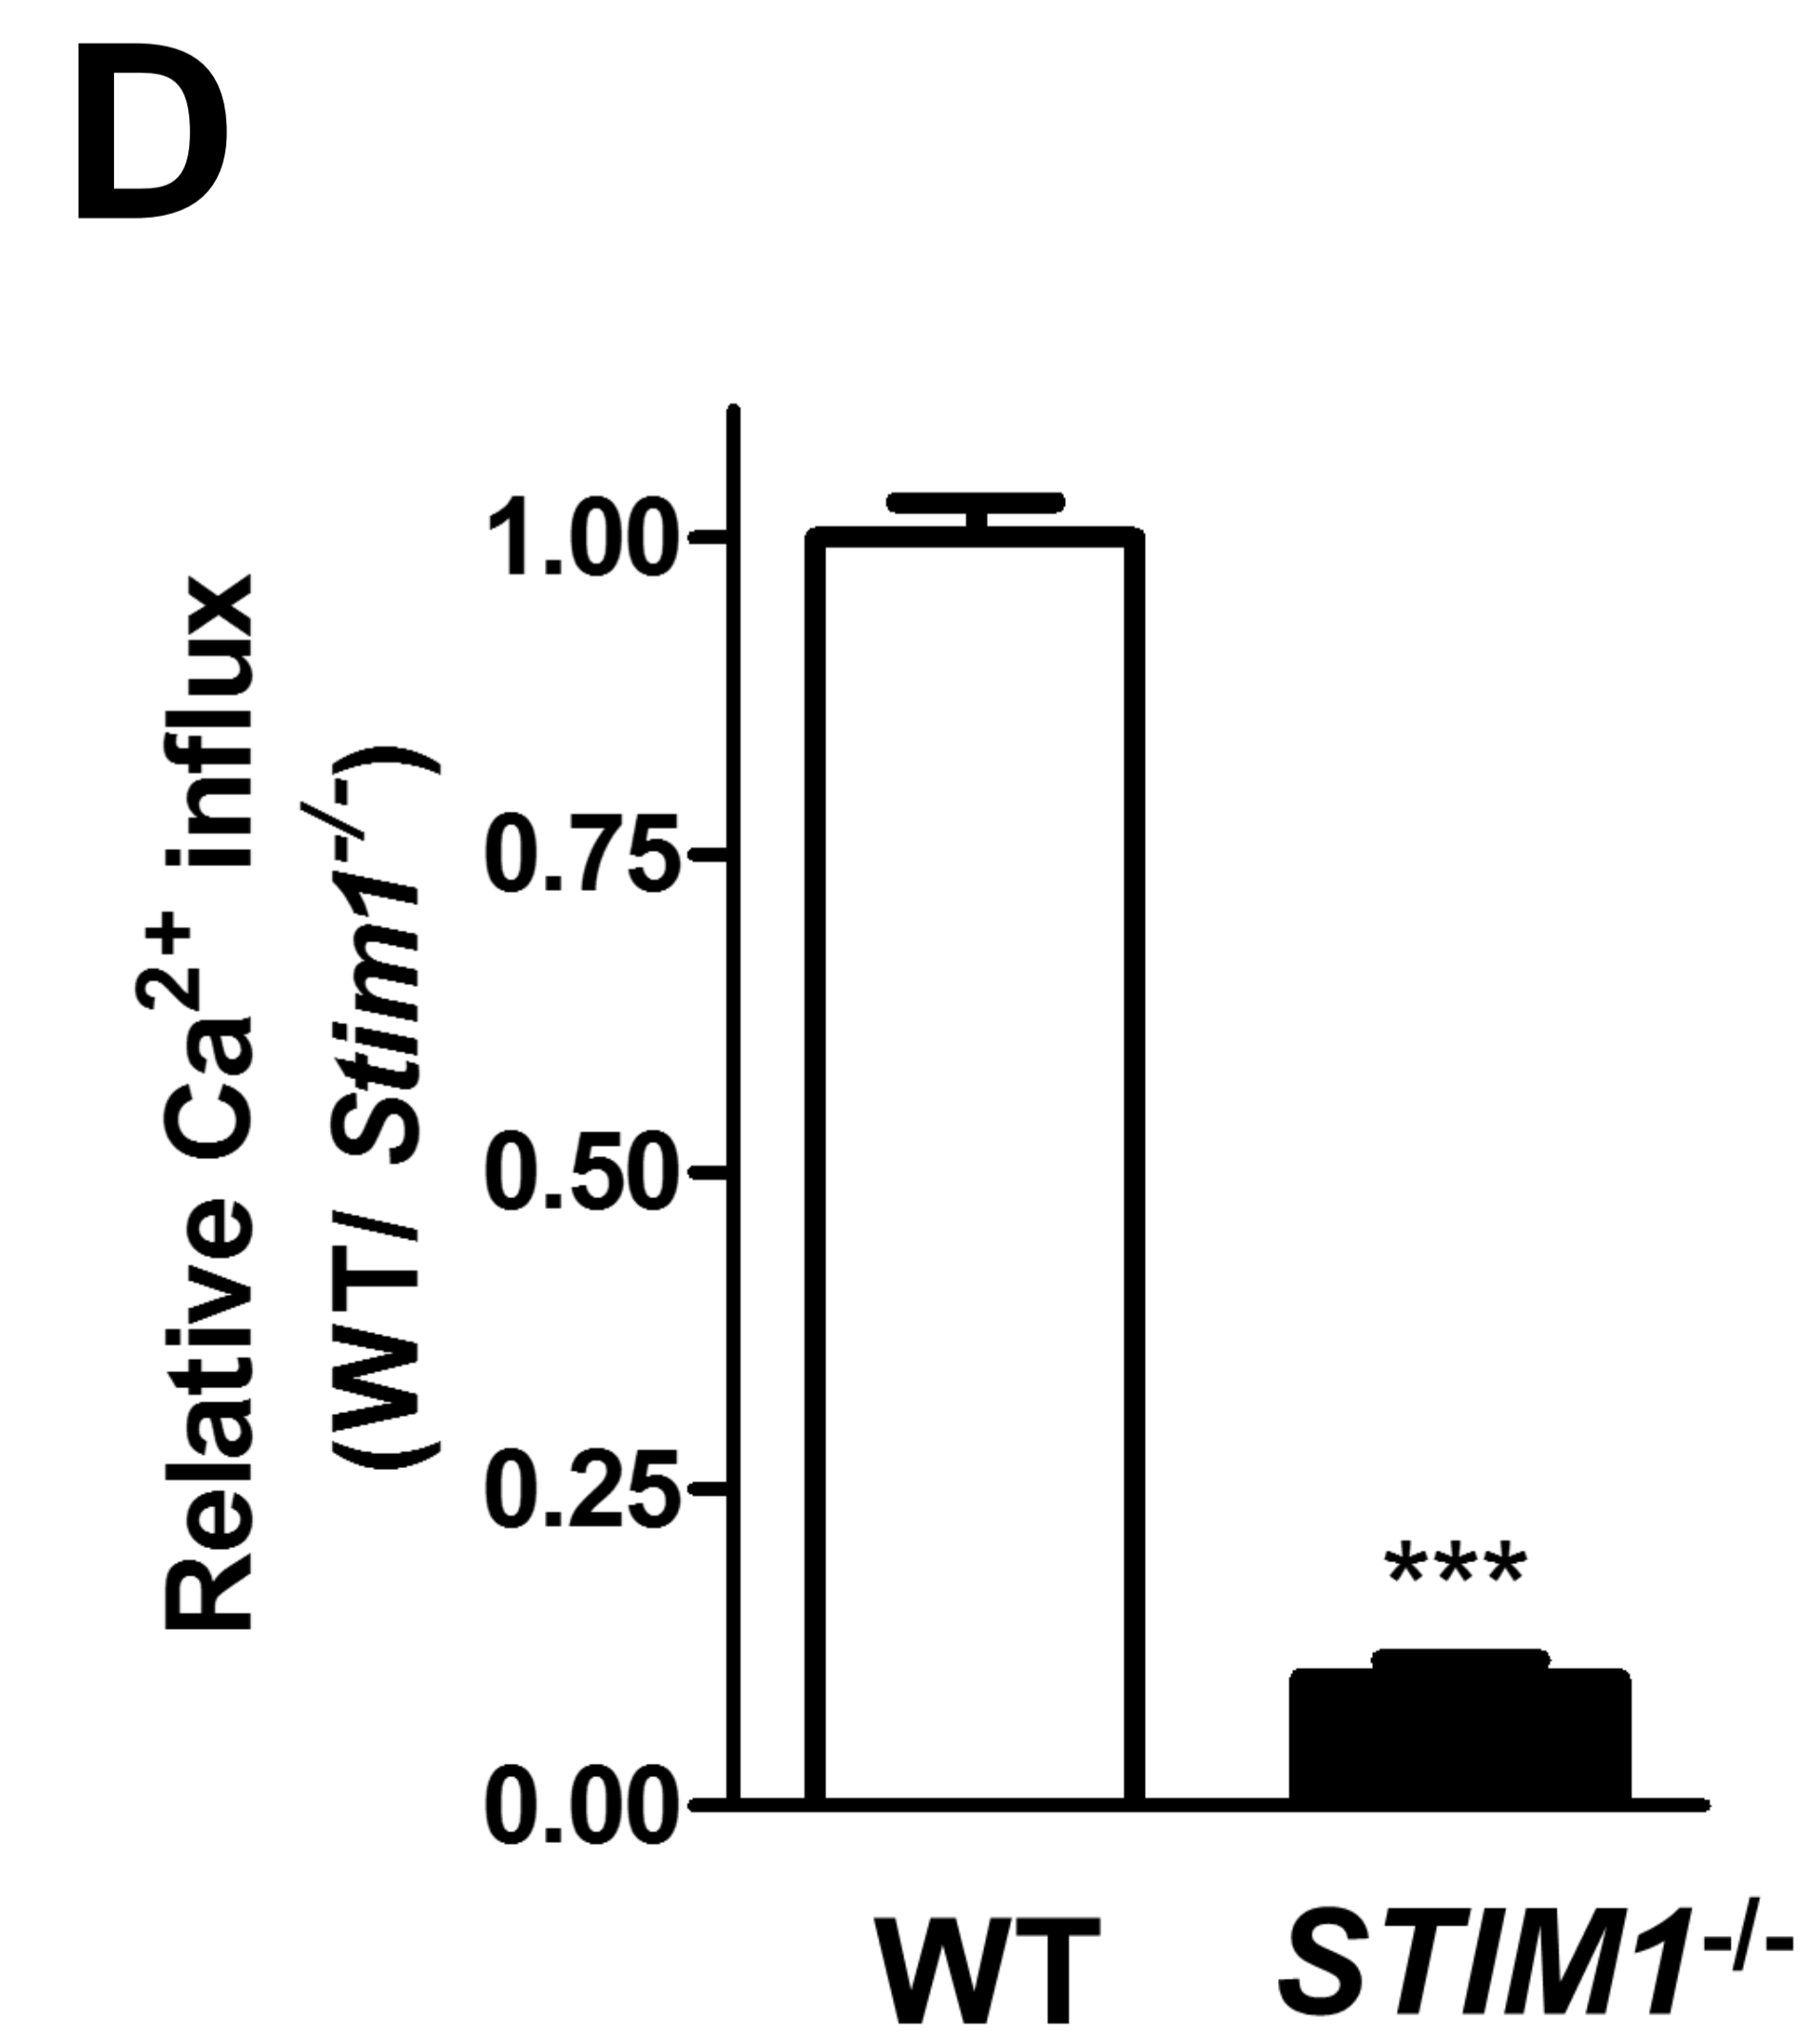

**Supplement Figure 3.** Thapsigargin induced Orai1 and STIM1 co-localization in WT microglia.

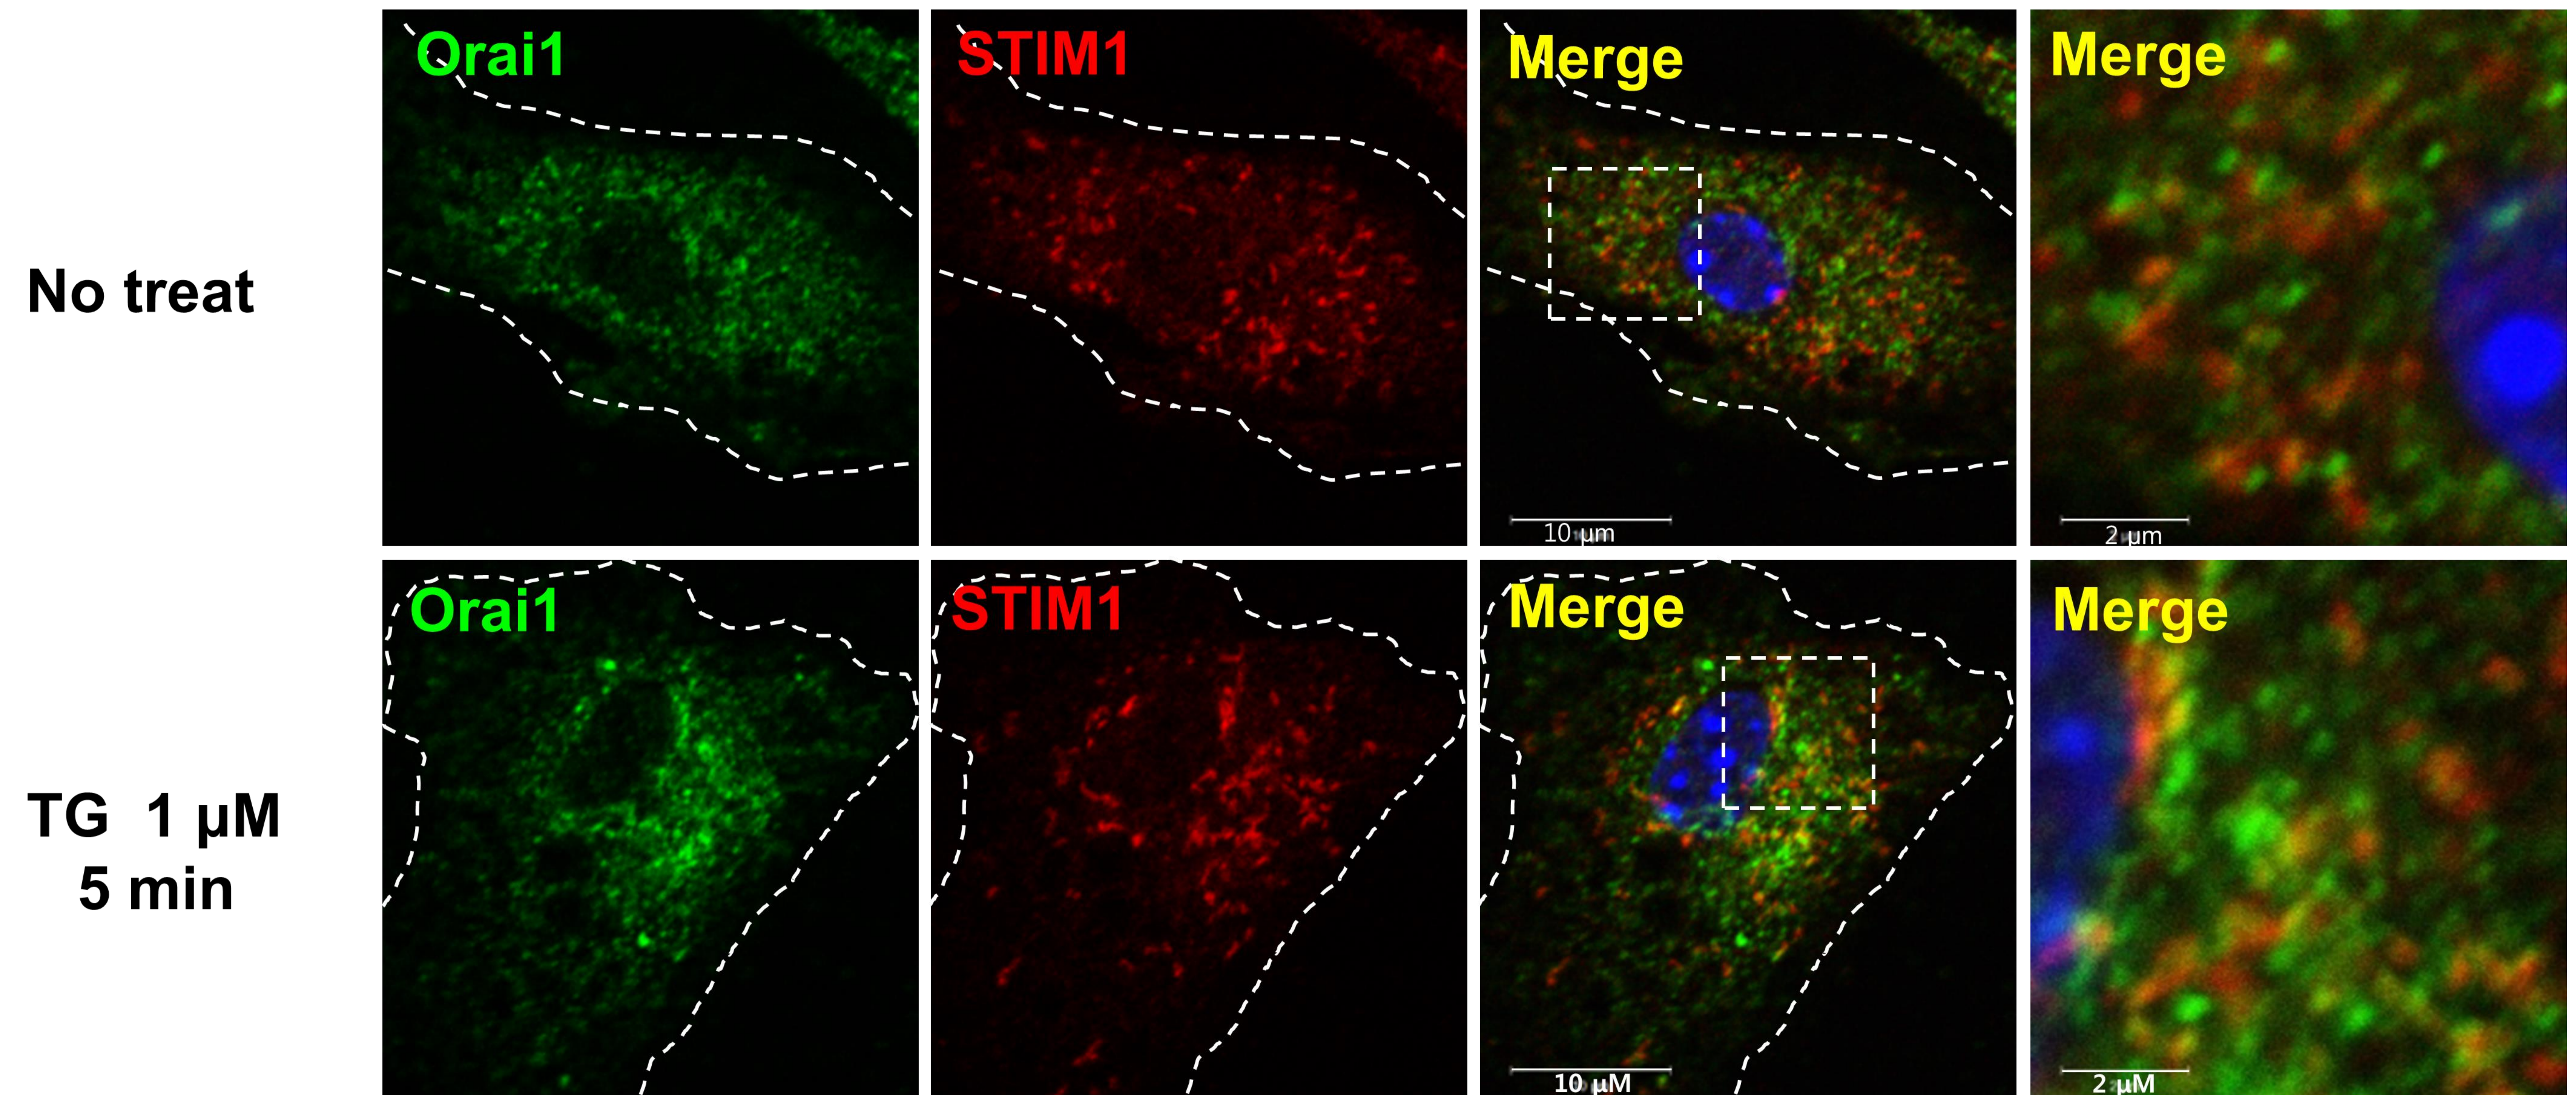

**Supplement Figure 4.** Expression of purinergic receptors in primary cultured microglia from wild-type and *STIM1*<sup>-/-</sup> mice.

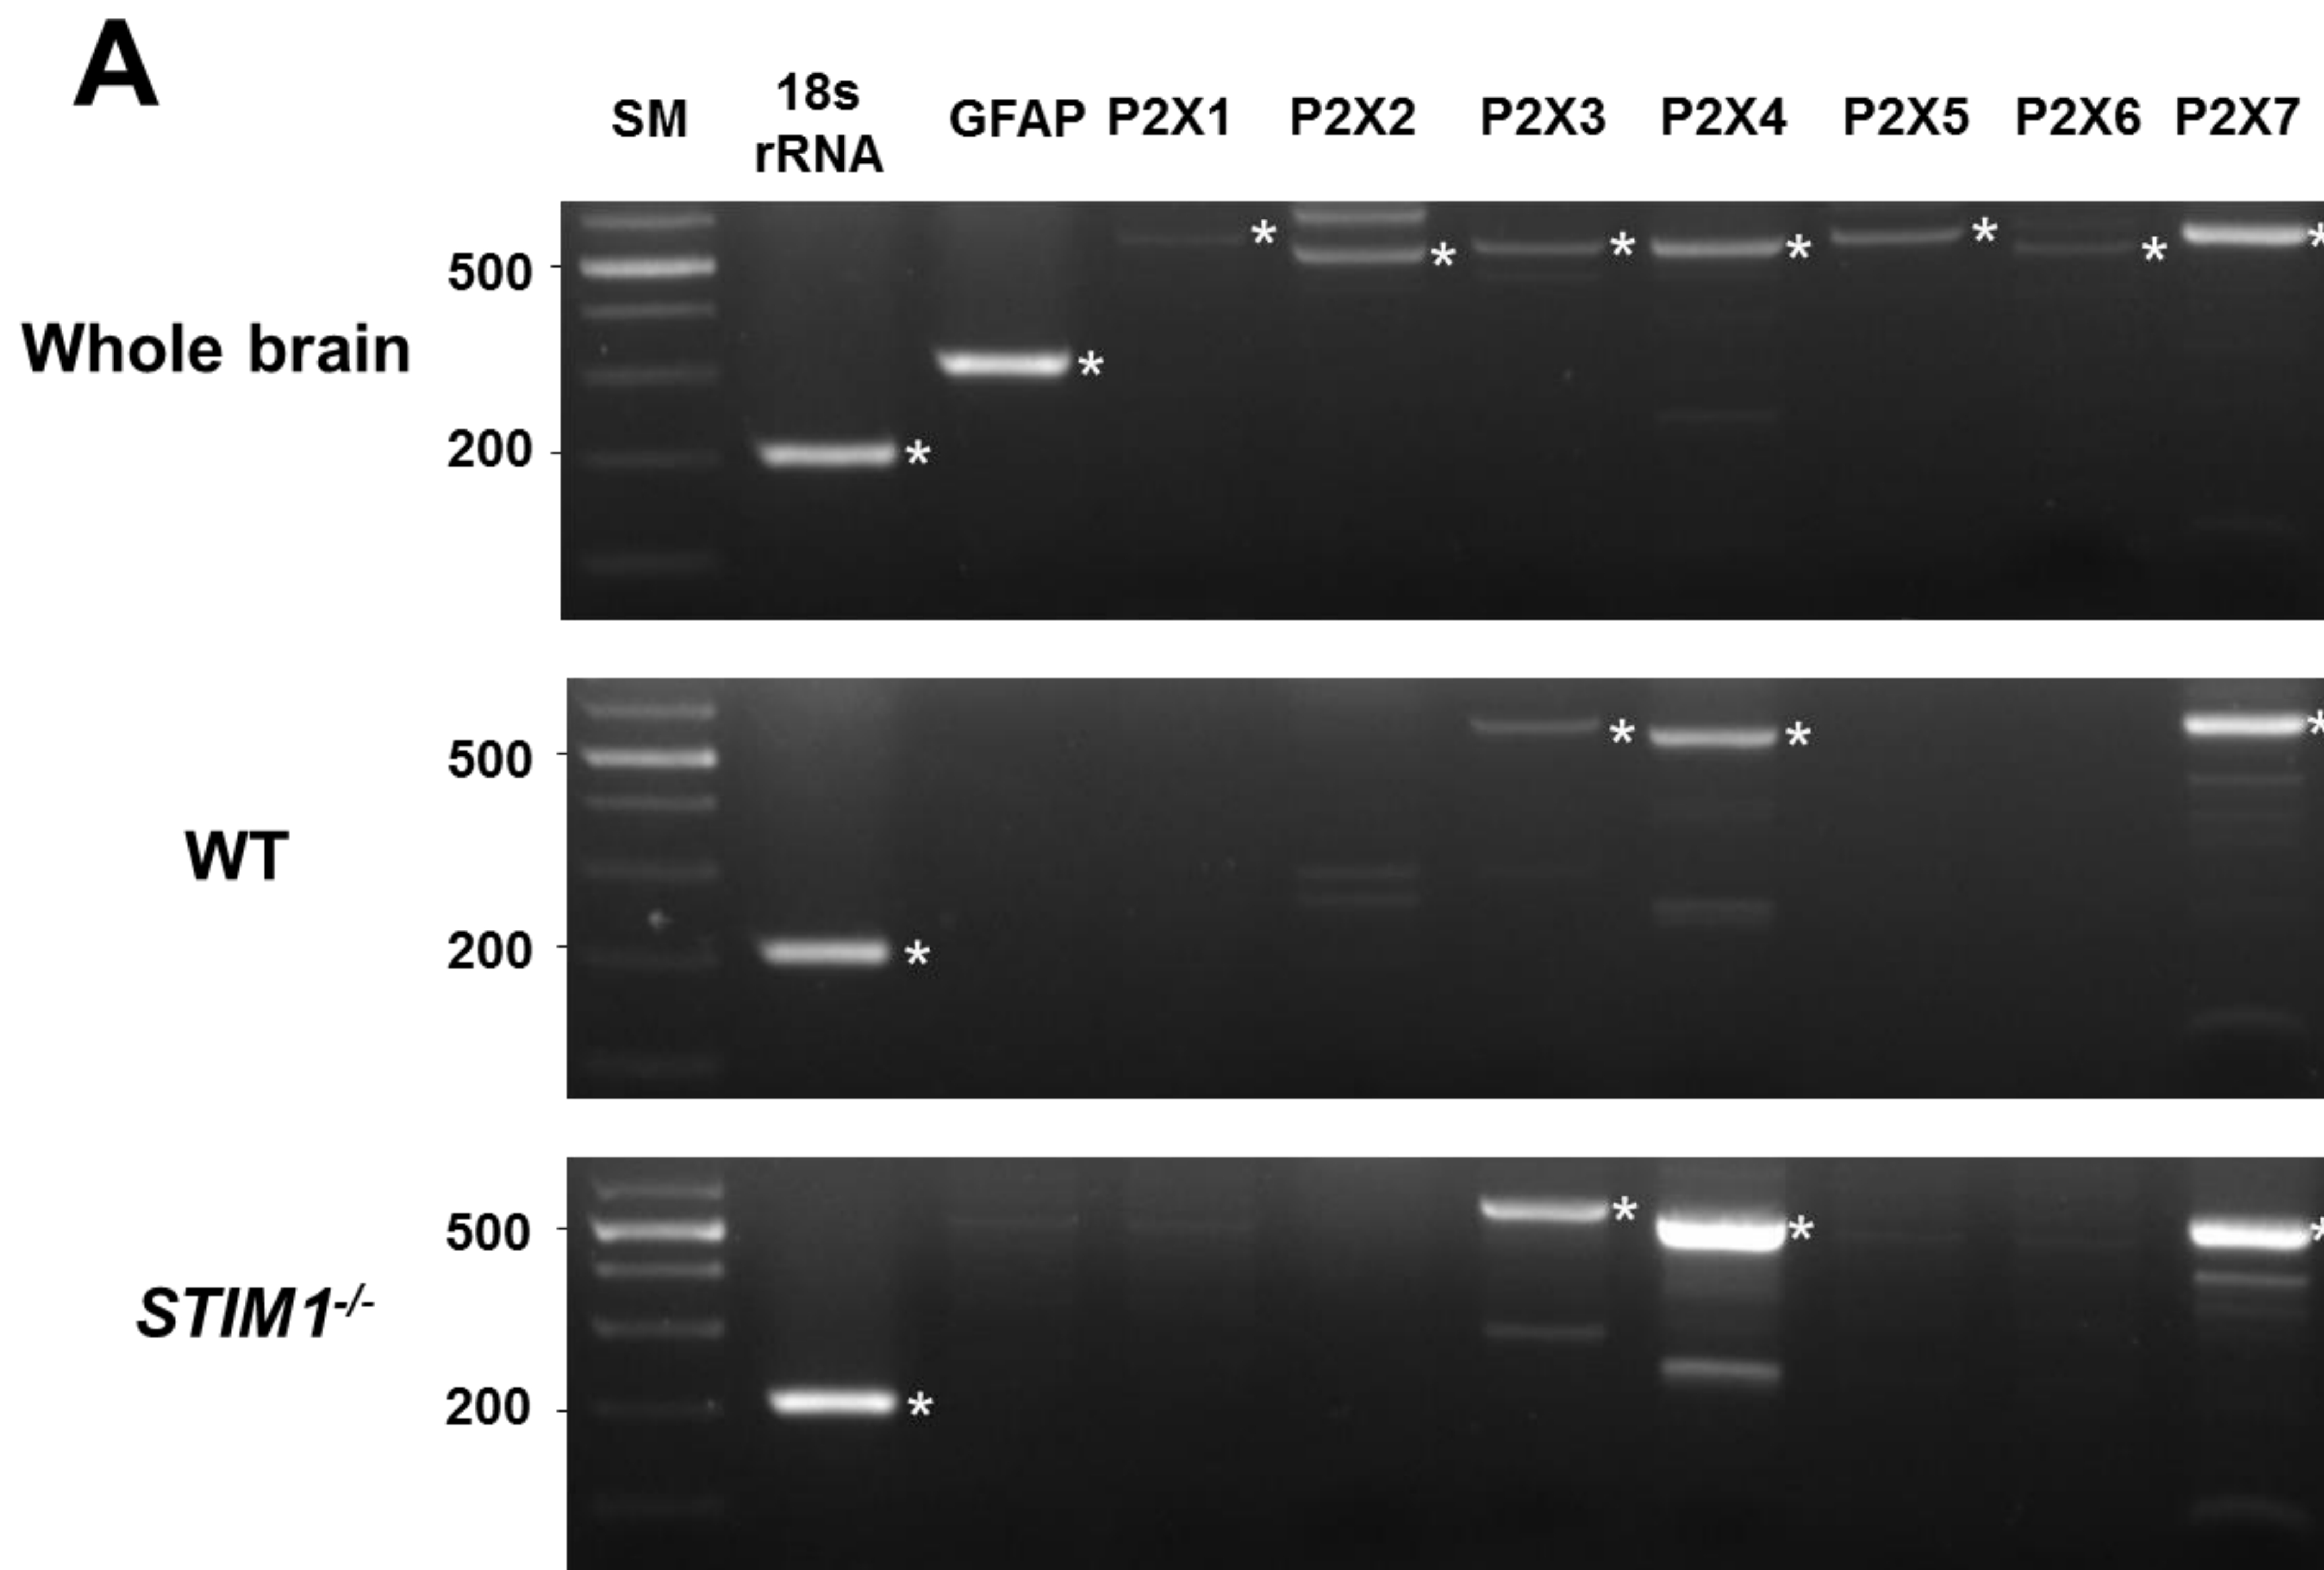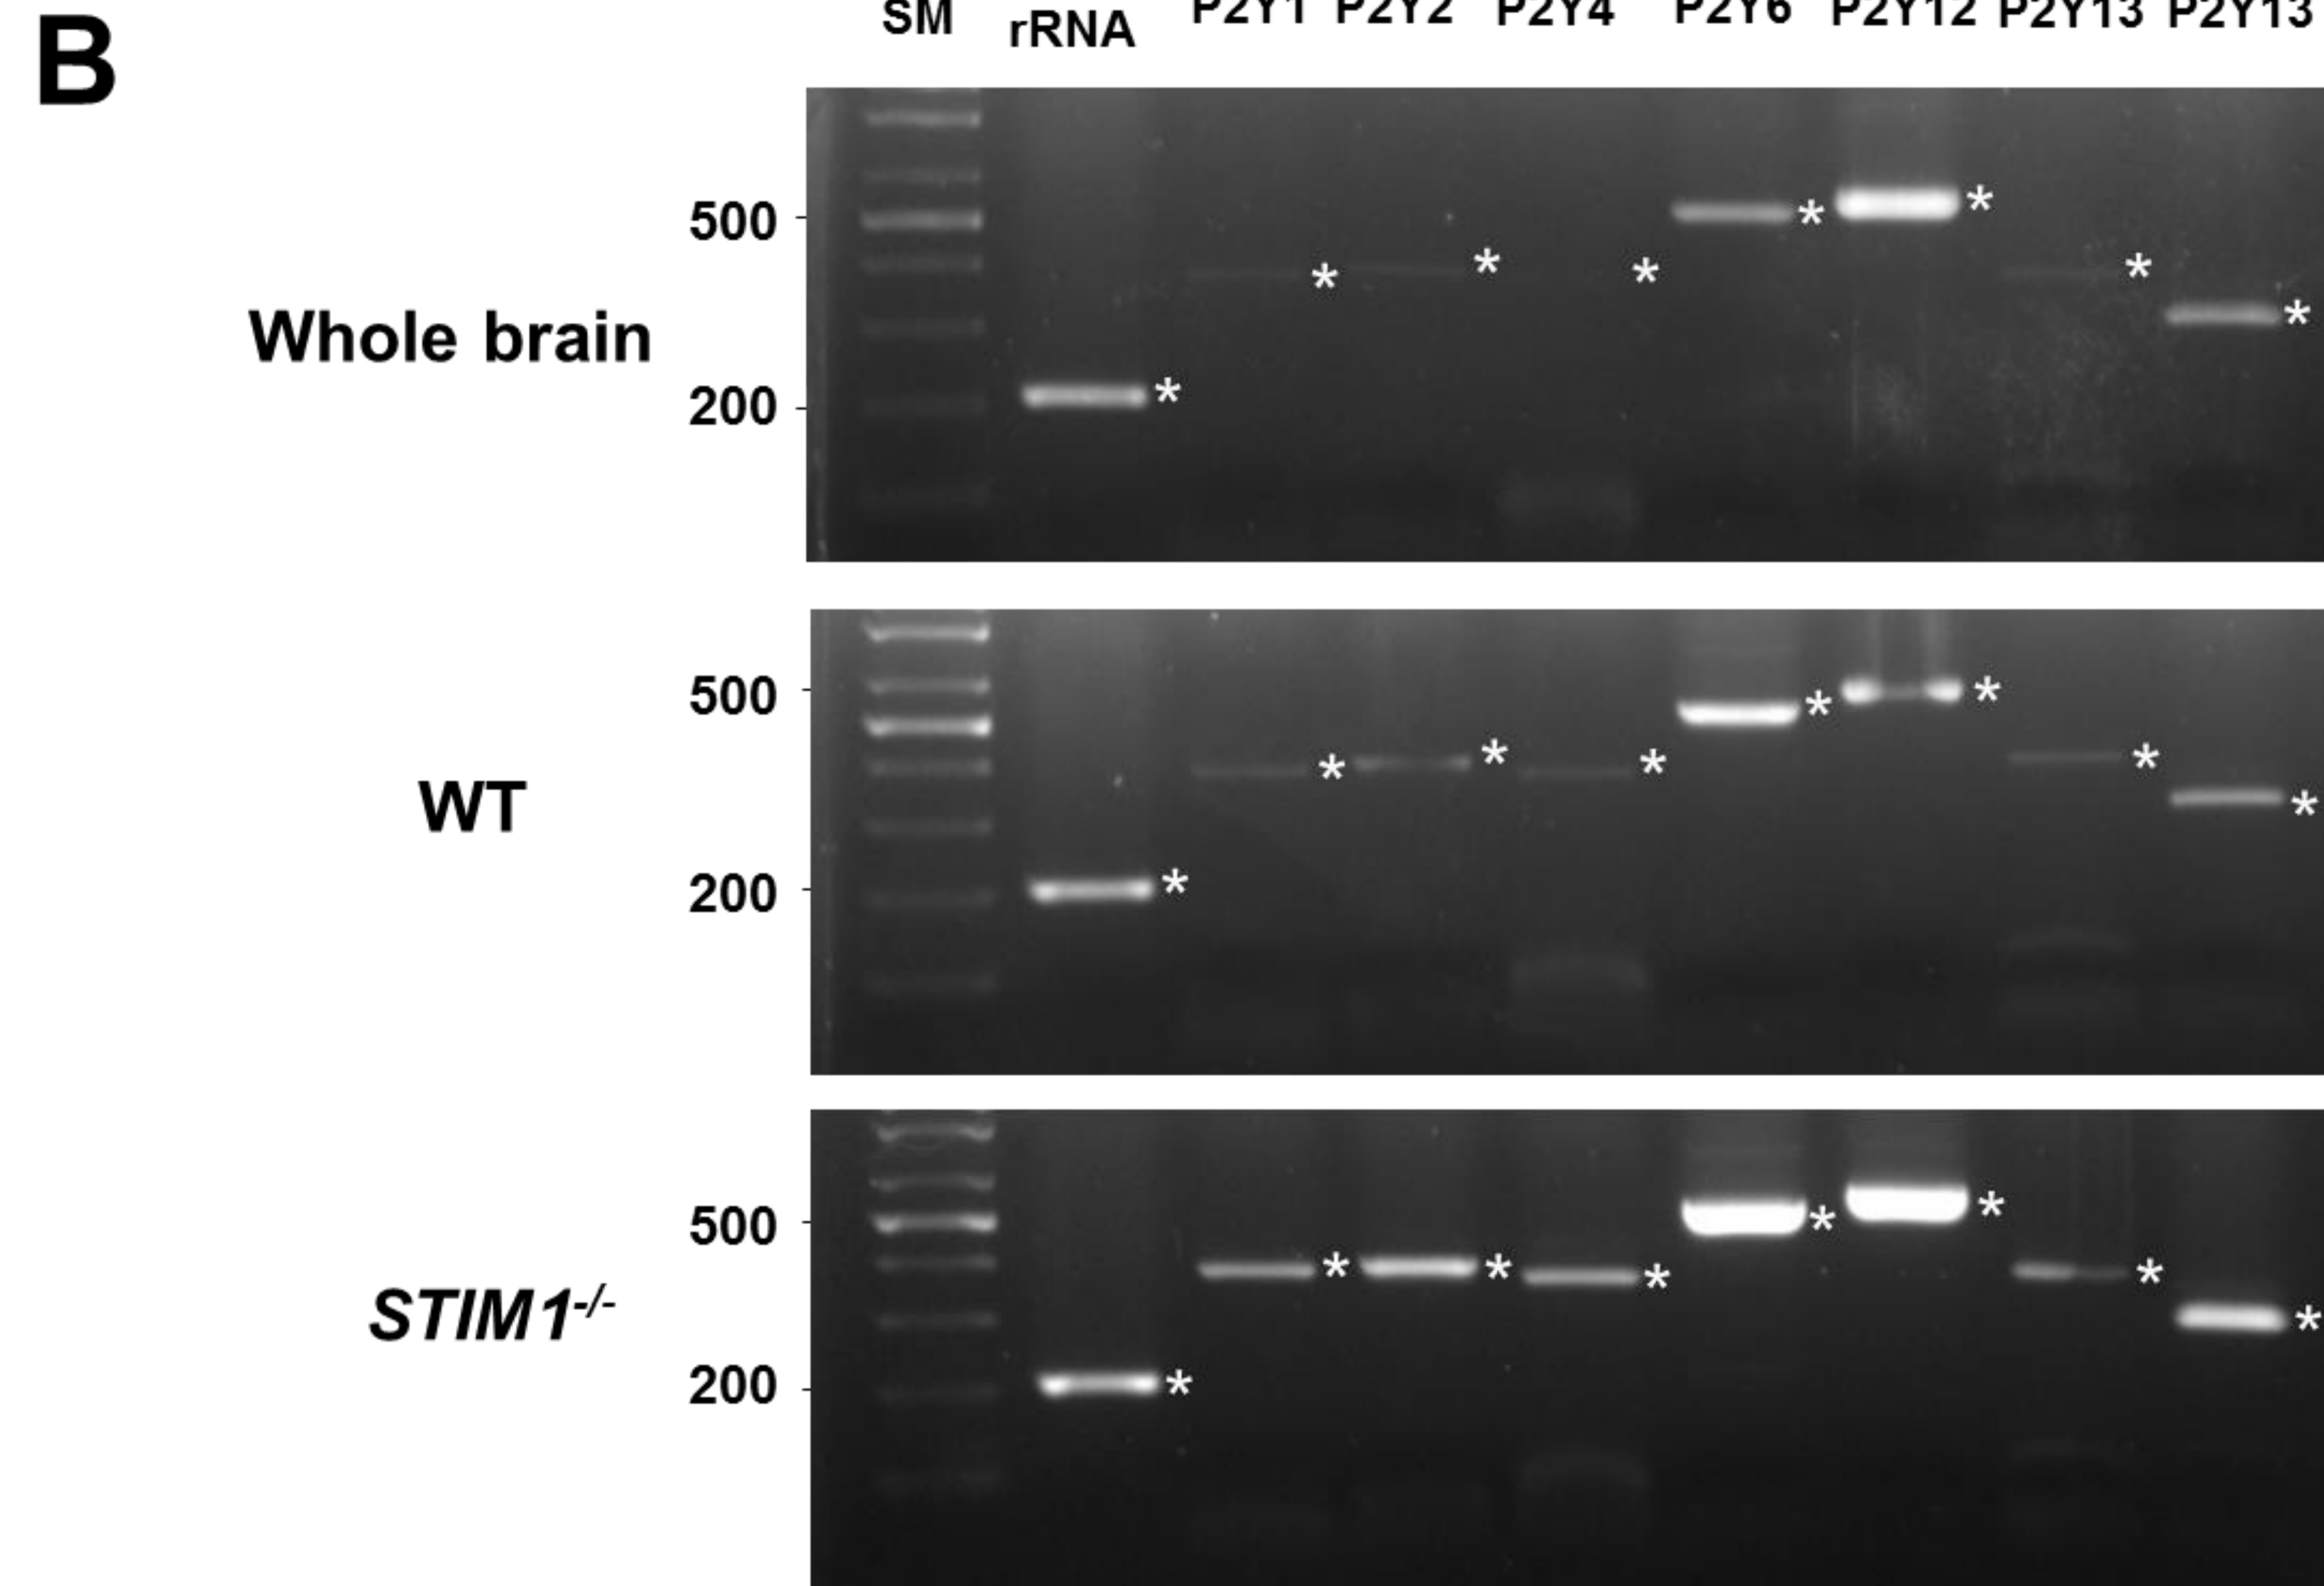

# Supplement Table 1. Primers used in supplement figure 4.

| Gene name | Primers                             | Product size |
|-----------|-------------------------------------|--------------|
| P2X1      | S, 5'-GAAACTCAAGGGCTTGGCTGTGAC-3'   | 546 bp       |
|           | AS, 5'-TTCTCAGCAAGGCTTCGGAAGTCC-3'  |              |
| P2X2      | S, 5'-TCGGAACACAAAGTGTGGGACGT-3     | 515 bp       |
|           | AS, 5'-CCCTTGTGTGCCAGTTCTGTGAAG-3   |              |
| P2X3      | S, 5'-GCCGTTCACTGCTGATTATCTCC-3     | 533 bp       |
|           | AS, 5'-TGGAAGCGGCACTTCTTTATGTCC-3   |              |
| P2X4      | S, 5'-ATGGCAGGCTGCTGCTCCGT-3        | 531 bp       |
|           | AS, 5'-AGCTGGCGTTGGCACACC-3         |              |
| P2X5      | S, 5'-TAAAGCTGCCTCCCCTGCAAC-3       | 554 bp       |
|           | AS, 5'-GCAAGATCTGTGATGGCTTCATGTTC-3 |              |
| P2X6      | S, 5'-AGGAACTGGGAACATGGCTTCTGC-3    | 497 bp       |
|           | AS, 5'-TCCTGTGGGTTCCGTTGAACAC-3     |              |
| P2X7      | S, 5'-ATGCCGGCTTGCTGCAGC-3          | 557 bp       |
|           | AS, 5'-TCGGCGCTCCTCAAGAGT-3         |              |
|           |                                     |              |
| P2Y1      | S, 5'-CCAGTTCTACTACCTGCCG-3         | 381 bp       |
|           | AS, 5'-CACACCAGCACGCTGAC-3          |              |
| P2Y2      | S, 5'-GTTGTGCCTGAACGTCG-3           | 386 bp       |
|           | AS, 5'-CGCTGGTGGTGACGAAG-3          |              |
| P2Y4      | S, 5'-CTGCAAGTTCGTCCGCTTTC-3        | 369 bp       |
|           | AS, 5'-GGTCGATACAGTCGCCGG-3         |              |
| P2Y6      | S, 5'-ATGGAGCAGGACAATGGCACC-3       | 529 bp       |
|           | AS, 5'-ACACAGTGCGGTTGCGCT-3         |              |
| P2Y12     | S, 5'-ATGGATGTGCCTGGTGTCAACACC-3    | 580 bp       |
|           | AS, 5'-CGTGCCAACTAGACCAAACCTCTGAC-3 |              |
| P2Y13     | S, 5'-ATCAACACCACTGGGATGCA-3        | 387 bp       |
|           | AS, 5'-CCTGAACGGCATGATGATC-3        |              |
| P2Y14     | S, 5'-CCACCACAGACCCTCCAAAC-3        | 320 bp       |
|           | AS, 5'-GAACACGATGCTGACGTACAT-3      |              |
|           |                                     |              |
| 18S rRNA  | S, 5'-TGCGCCGCTAGAGGTGAAATTC-3      | 200 bp       |
|           | AS, 5'-GGCATCGTTTATGGTCGGAACTAC-3   |              |
| GFAP      | S, 5'-TGATGGAGCTCAATGACCG-3         | 315 bp       |
|           | AS, 5'-CATCTGCCTCCTGTCTATACGC-3     |              |
